# Supplementary material for: Synthesis and biological evaluation of chalcone-triazole hybrid derivatives as 15-LOX inhibitors
Source: publisher site journal article supplement (doi:10.1515/znb-2017-0115), 2018-01-23

## Supporting Information

Ali Asadipour,<sup>a</sup> Saeedeh Noushini,<sup>b</sup> Setareh Moghimi,<sup>c</sup> Mohammad Mahdavi,<sup>d</sup> Hamid Nadri,<sup>e</sup>

Alireza Moradi,<sup>e</sup> Shabnam Shabani,<sup>a</sup> Loghman Firoozpour<sup>b</sup> and Alireza Foroumadi<sup>a,f,\*</sup>

### **Synthesis and biological evaluation of chalcone-triazole hybrid derivatives as 15-LOX inhibitors**

DOI: 10.1515/znb-2017-0115

<sup>a</sup> Department of Medicinal Chemistry, Faculty of Pharmacy and Neuroscience Research Center, Institute of Neuropharmacology, Kerman University of Medical Sciences, Kerman, I. R. Iran

<sup>b</sup> Drug Design and Development Research Center, Tehran University of Medical Sciences, Tehran, I. R. Iran

<sup>c</sup> Department of Medicinal Chemistry, Faculty of Pharmacy and Pharmaceutical Sciences Research Center, Tehran University of Medical Sciences, Tehran, I. R. Iran

<sup>d</sup> Endocrinology and Metabolism Research Center, Endocrinology and Metabolism Clinical Sciences Institute, Tehran University of Medical Sciences, Tehran, I. R. Iran

<sup>e</sup> Department of Medicinal Chemistry, Faculty of Pharmacy, Shahid Sadoughi University of Medical Sciences, Yazd, I. R. Iran

<sup>f</sup> Department of Medicinal Chemistry, Faculty of Pharmacy, Tehran University of Medical Sciences, Tehran, I. R. Iran

<sup>1</sup>H and <sup>13</sup>C NMR spectra of the synthesized compounds **4a–l**

$^1\text{H}$  NMR and  $^{13}\text{C}$  NMR spectra of compound **4a**

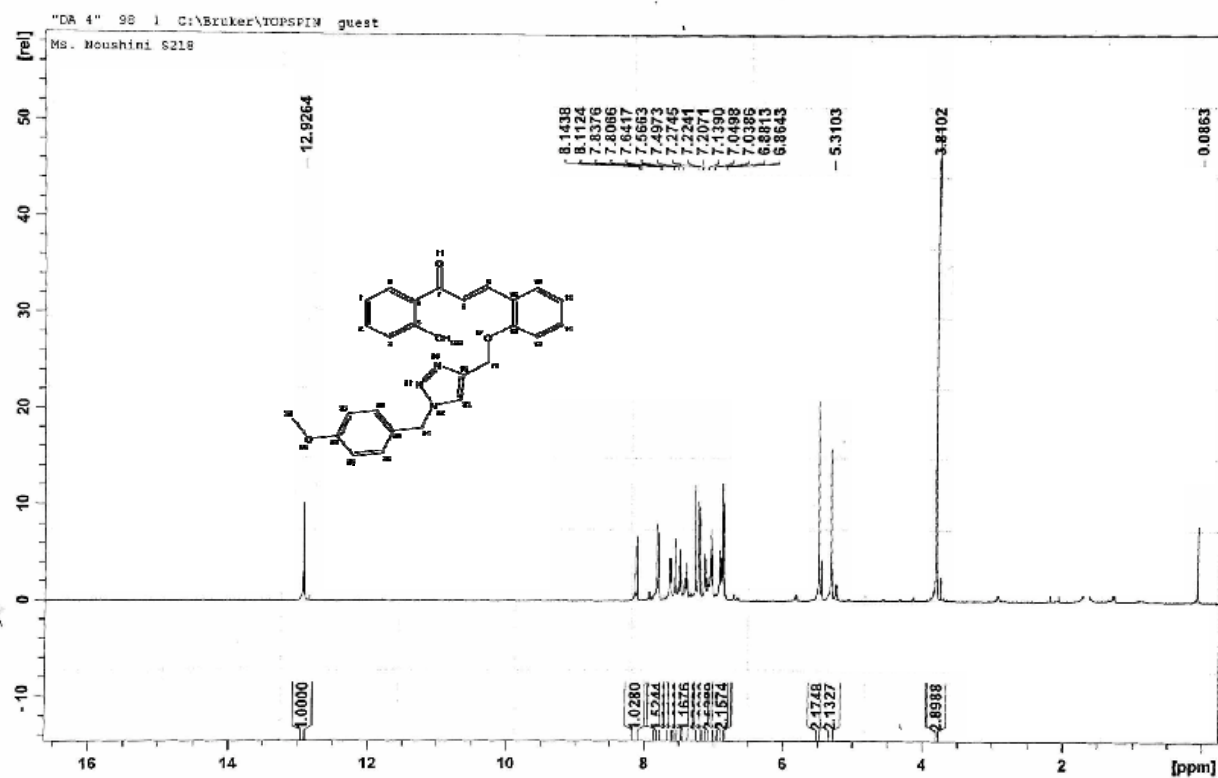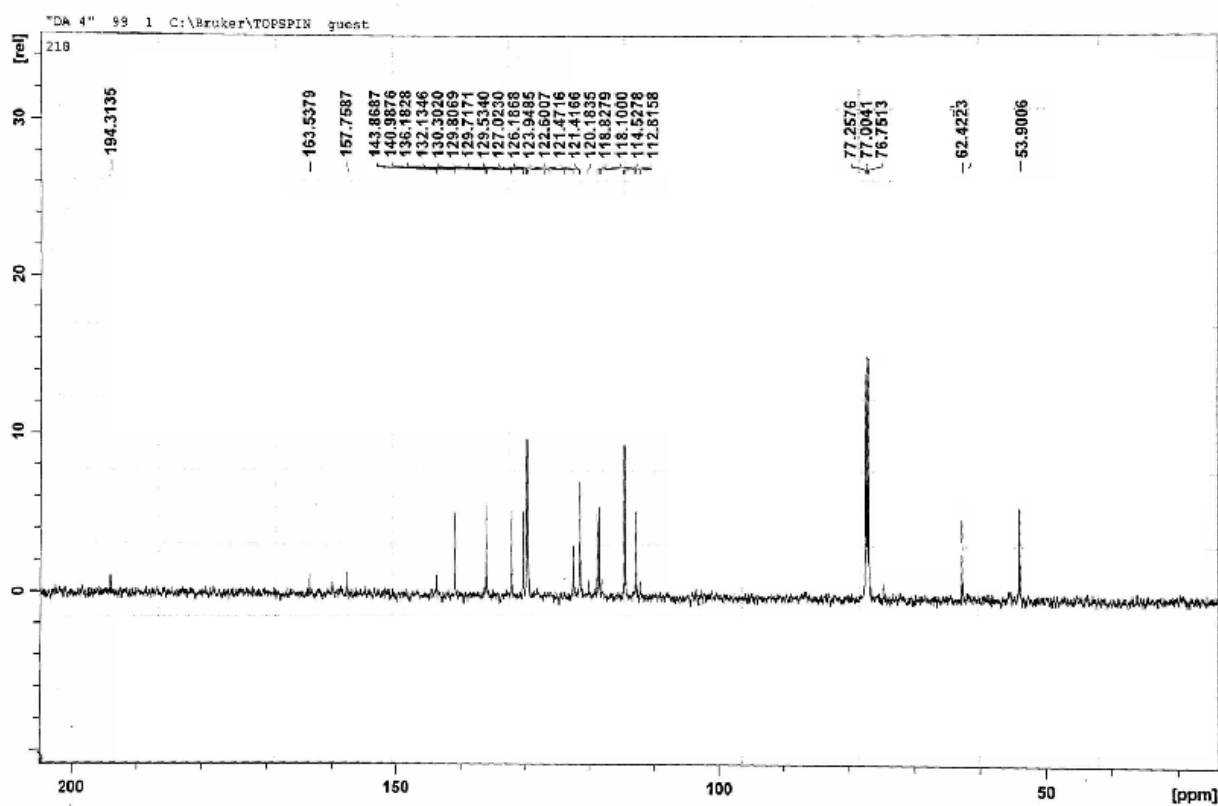

$^1\text{H}$  NMR and  $^{13}\text{C}$  NMR spectra of compound **4b**

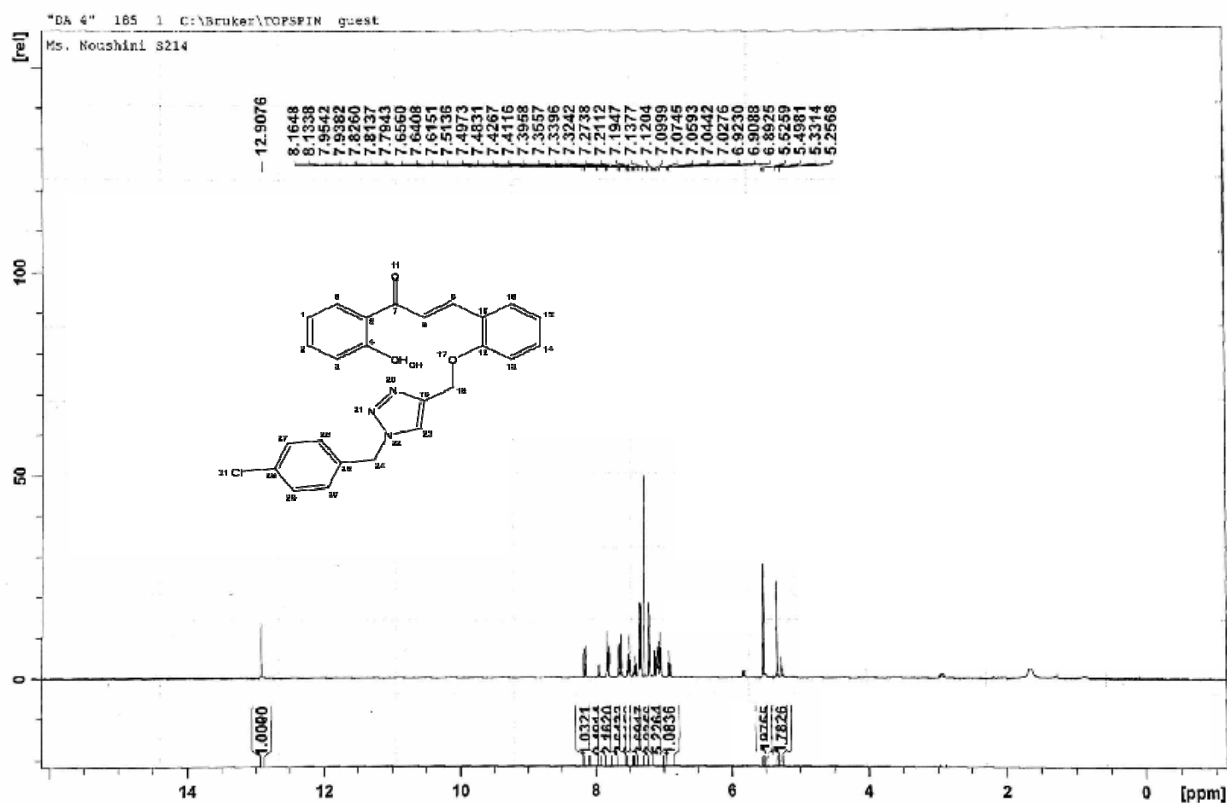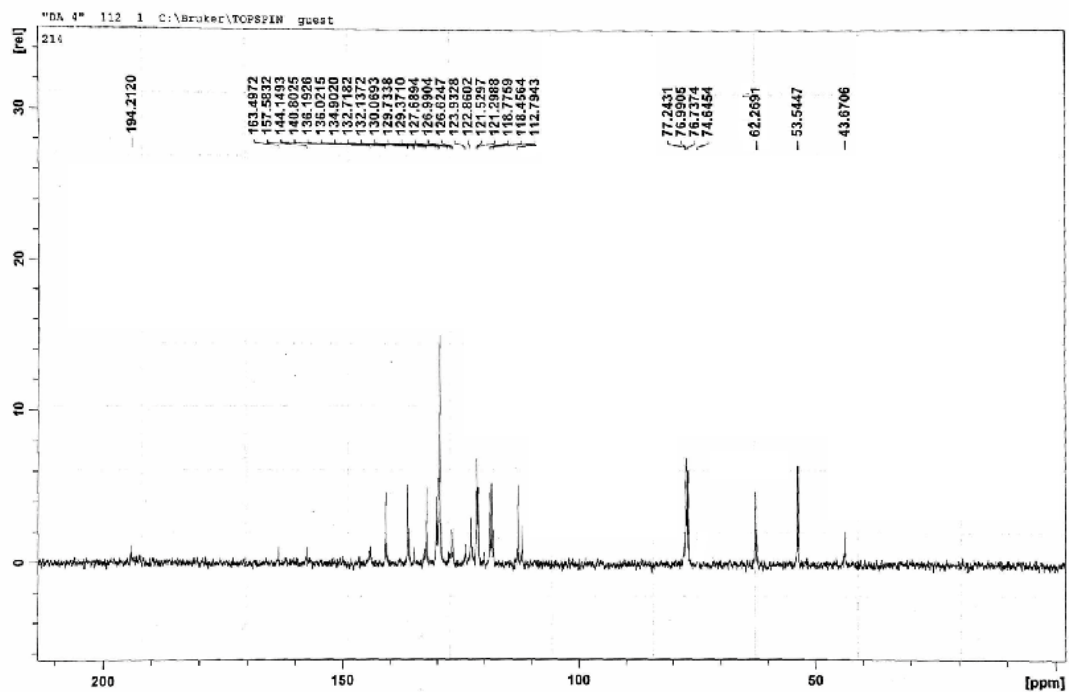

$^1\text{H}$  NMR and  $^{13}\text{C}$  NMR spectra of compound **4c**

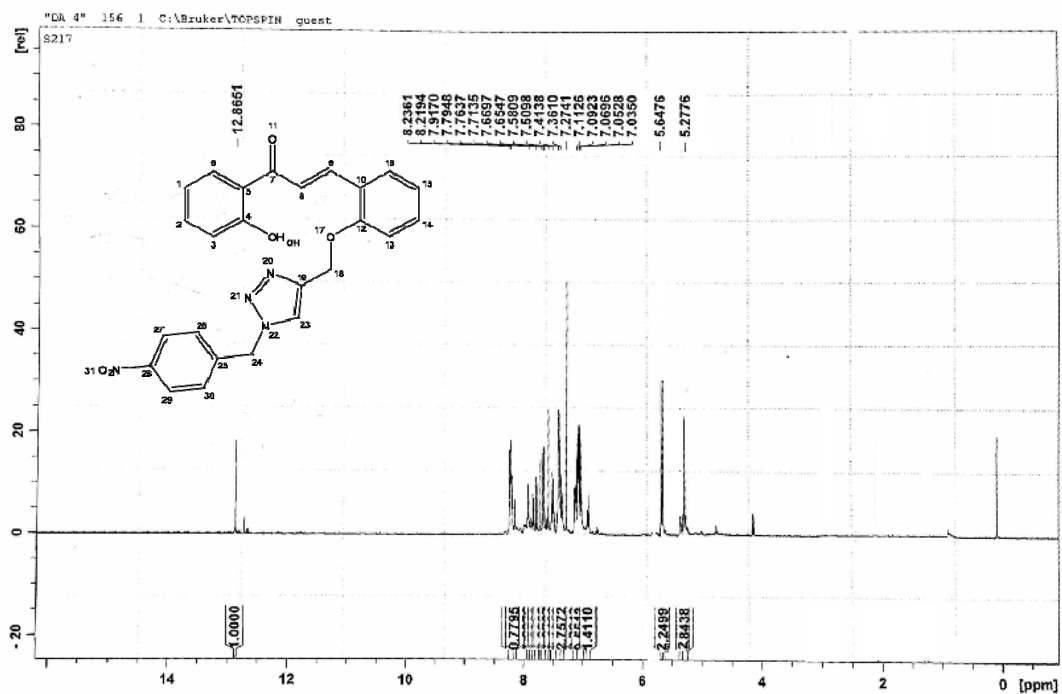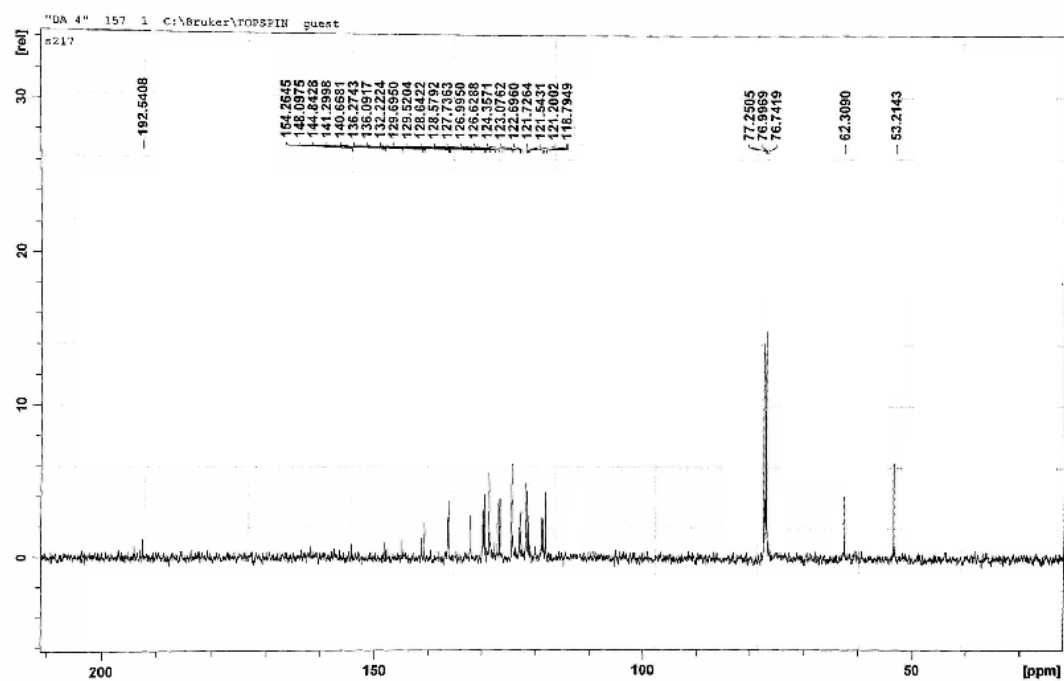

$^1\text{H}$  NMR and  $^{13}\text{C}$  NMR spectra of compound **4d**

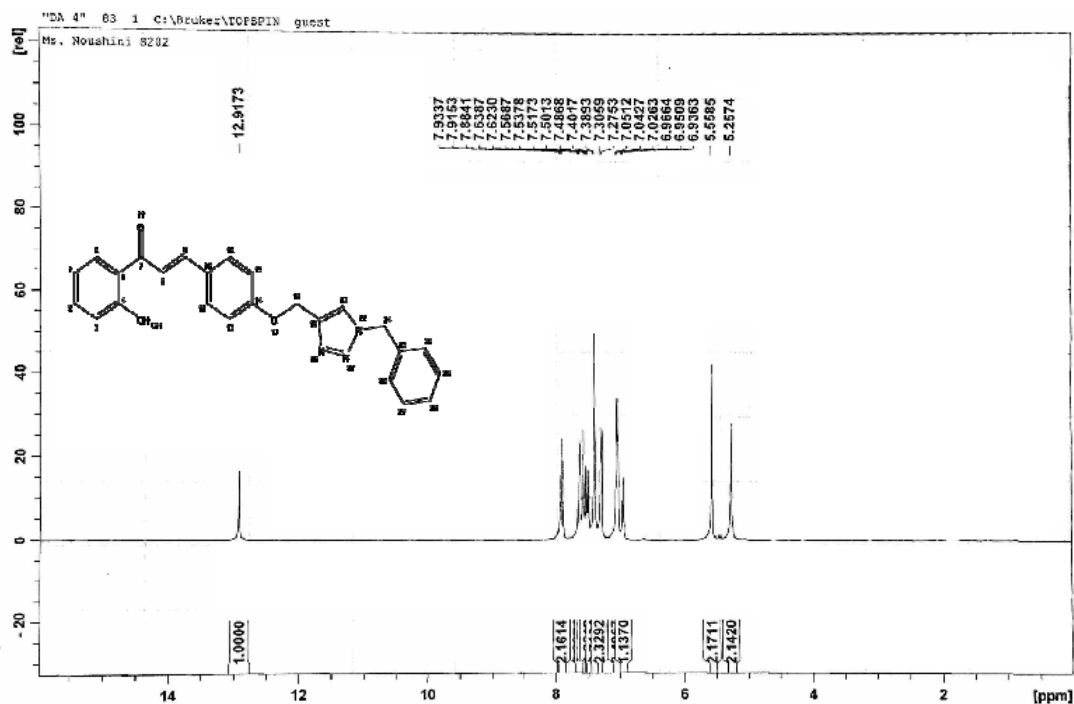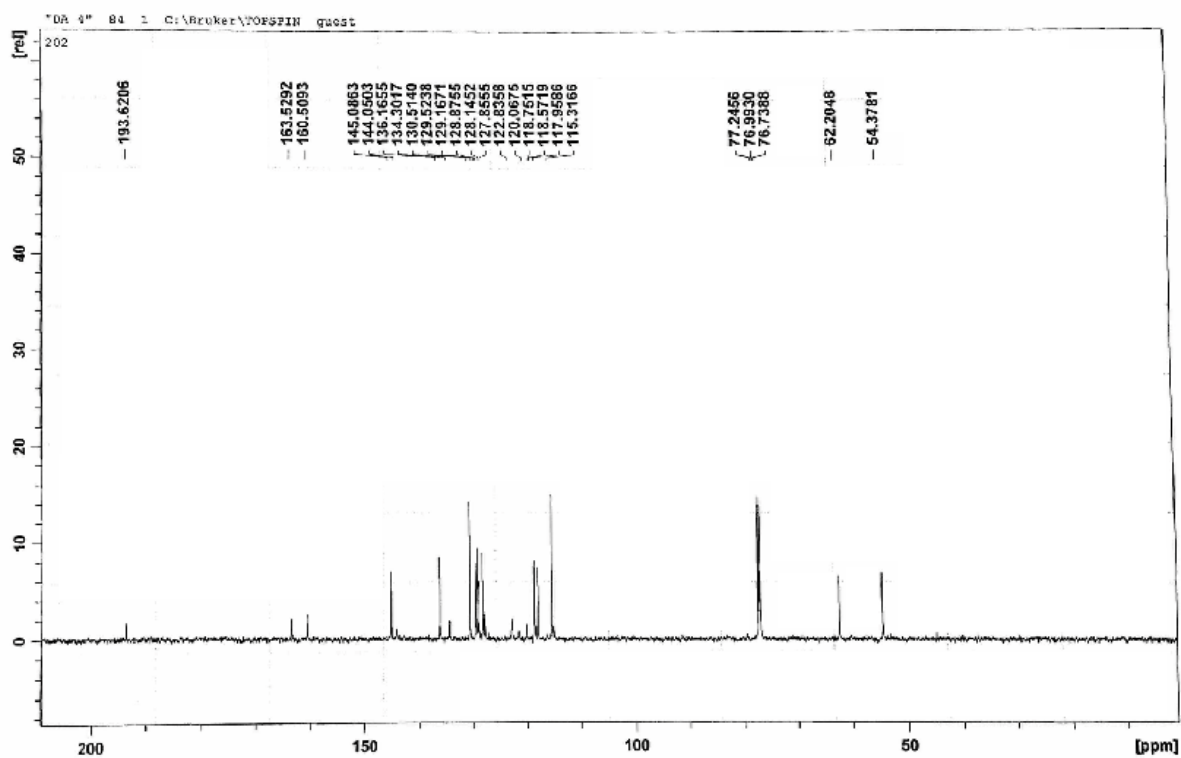

$^1\text{H}$  NMR and  $^{13}\text{C}$  NMR spectra of compound **4e**

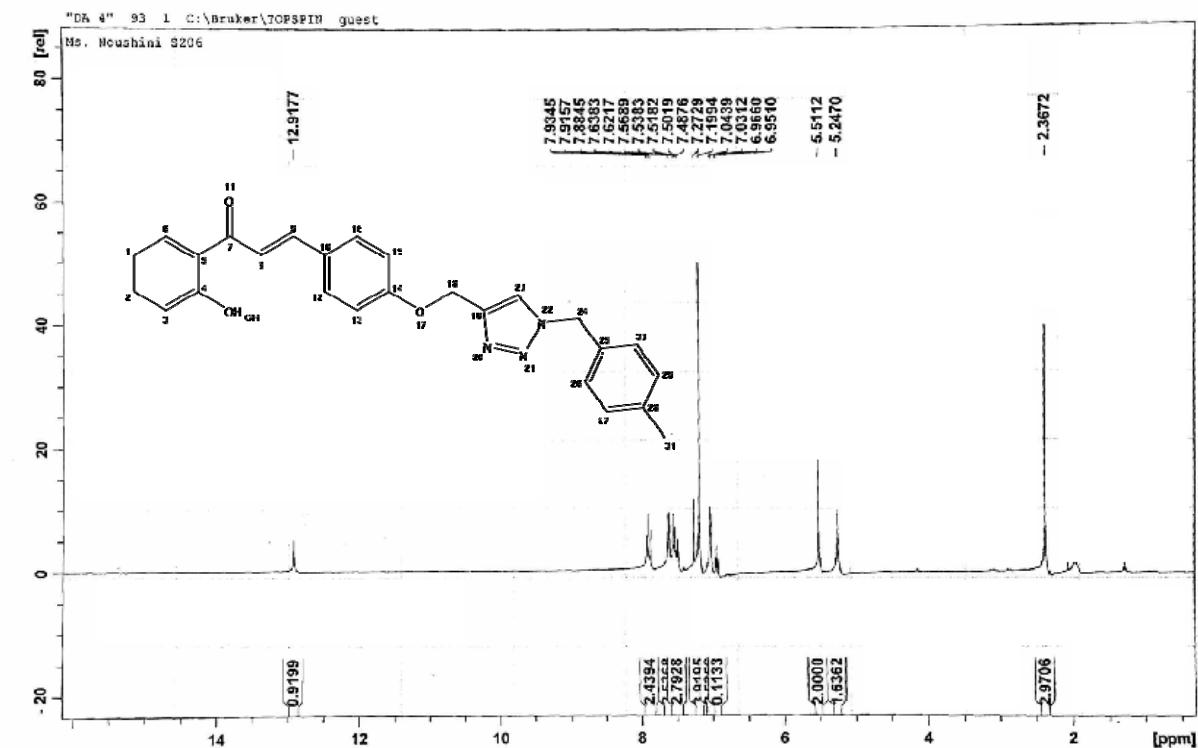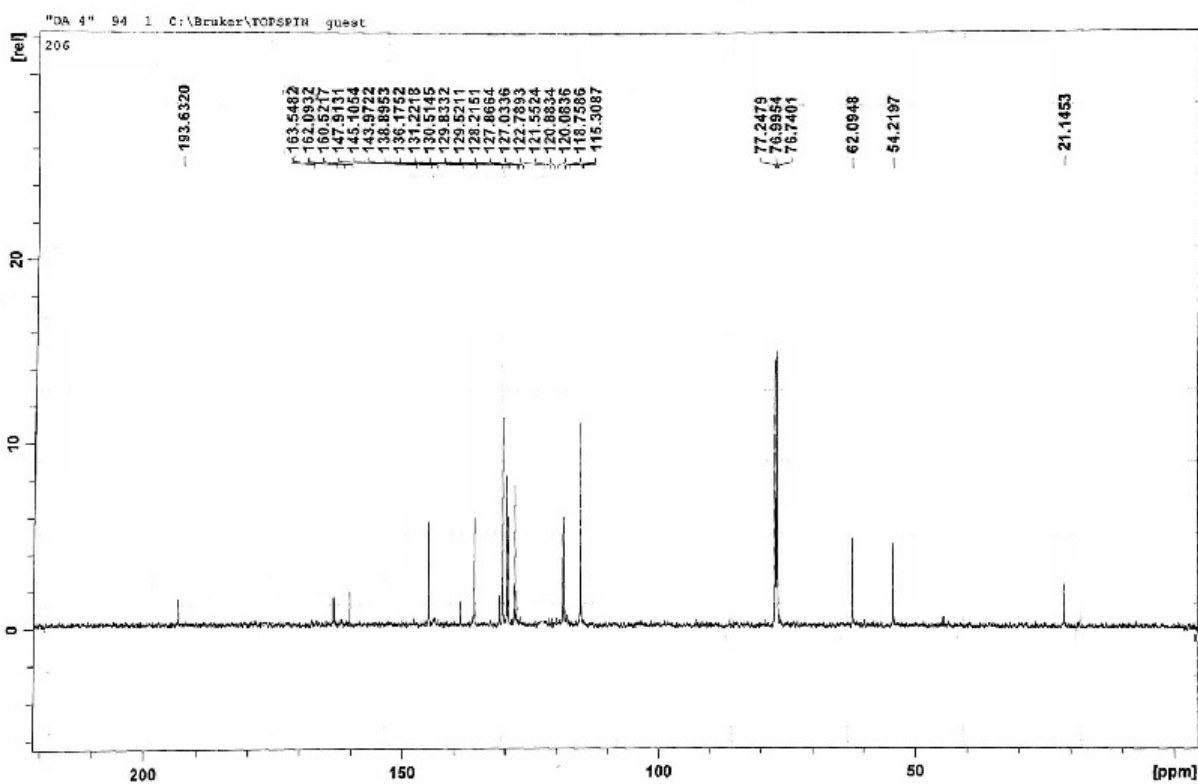

<sup>1</sup>H NMR and <sup>13</sup>C NMR spectra of compound **4f**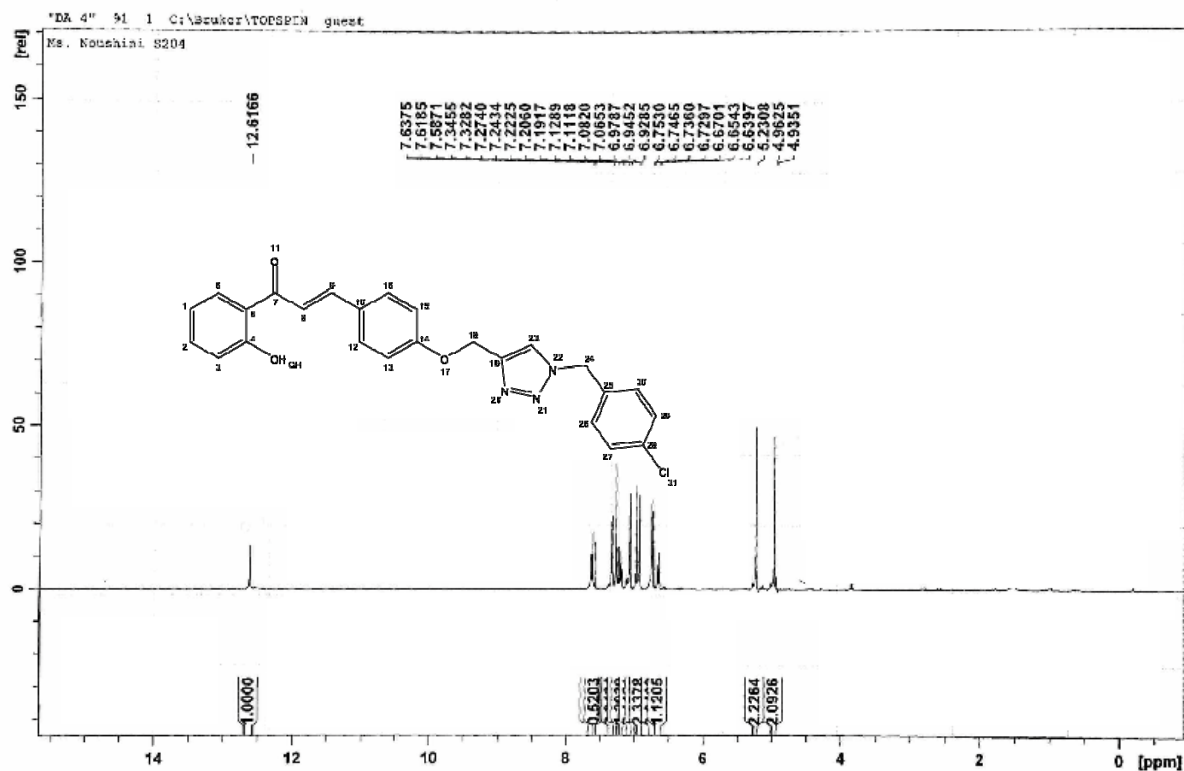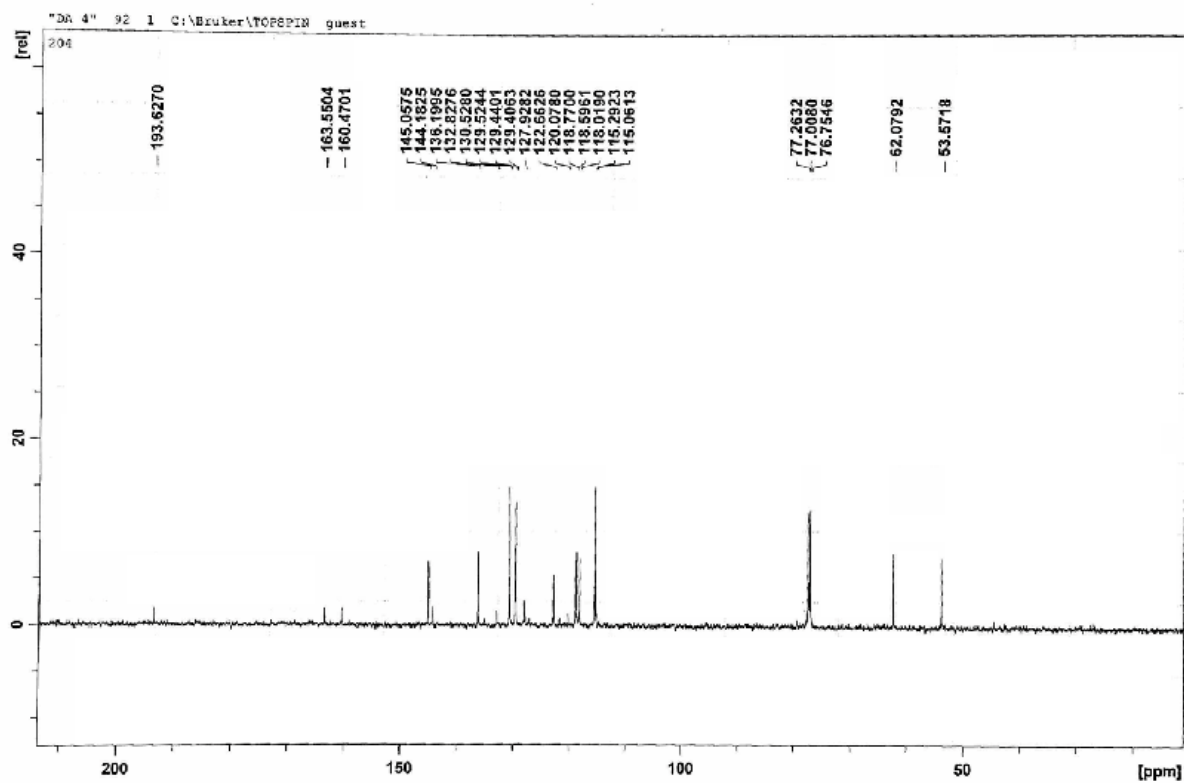

$^1\text{H}$  NMR and  $^{13}\text{C}$  NMR spectra of compound **4g**

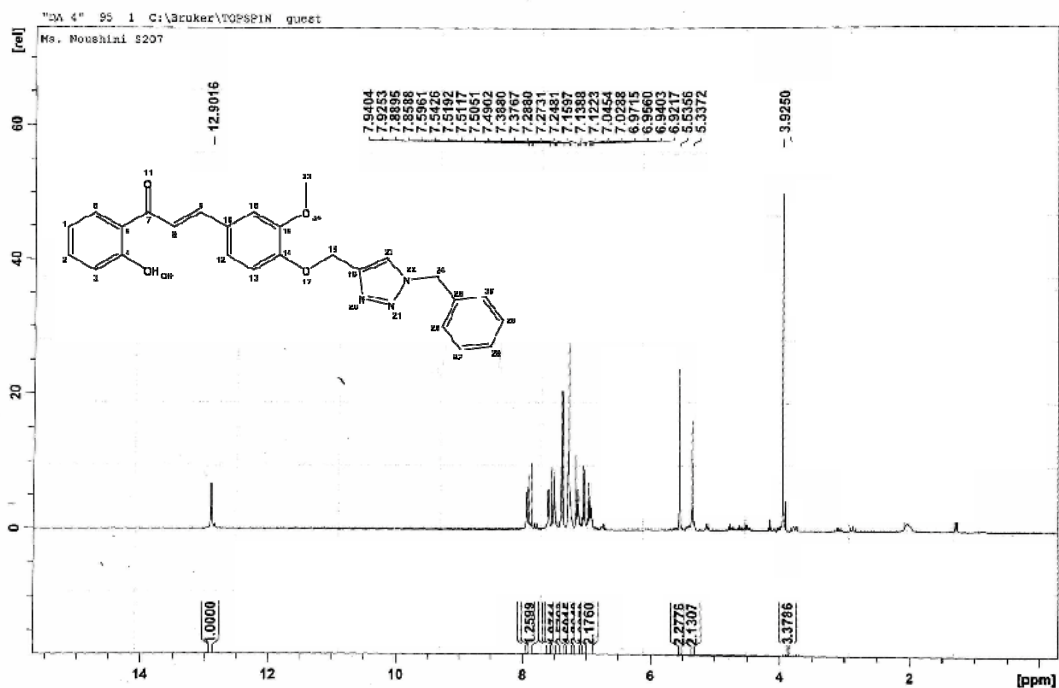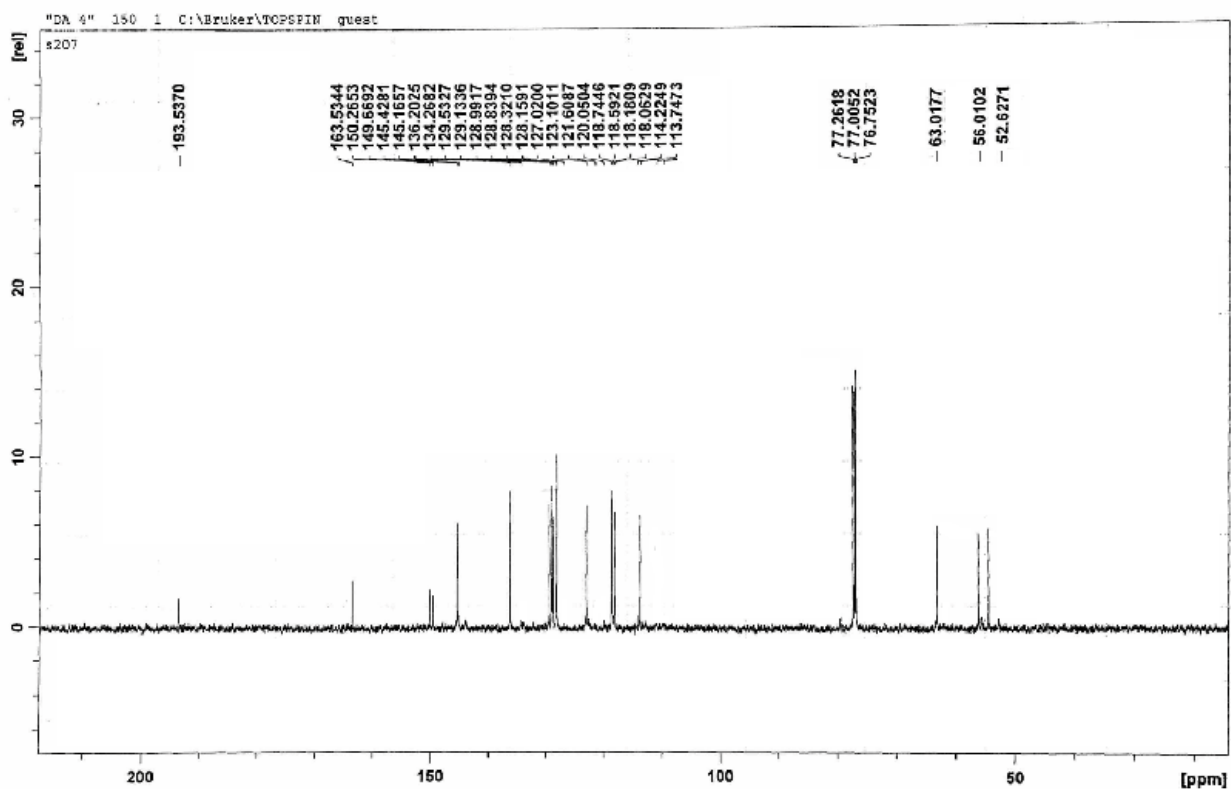



<sup>1</sup>H NMR spectrum of compound **4h**

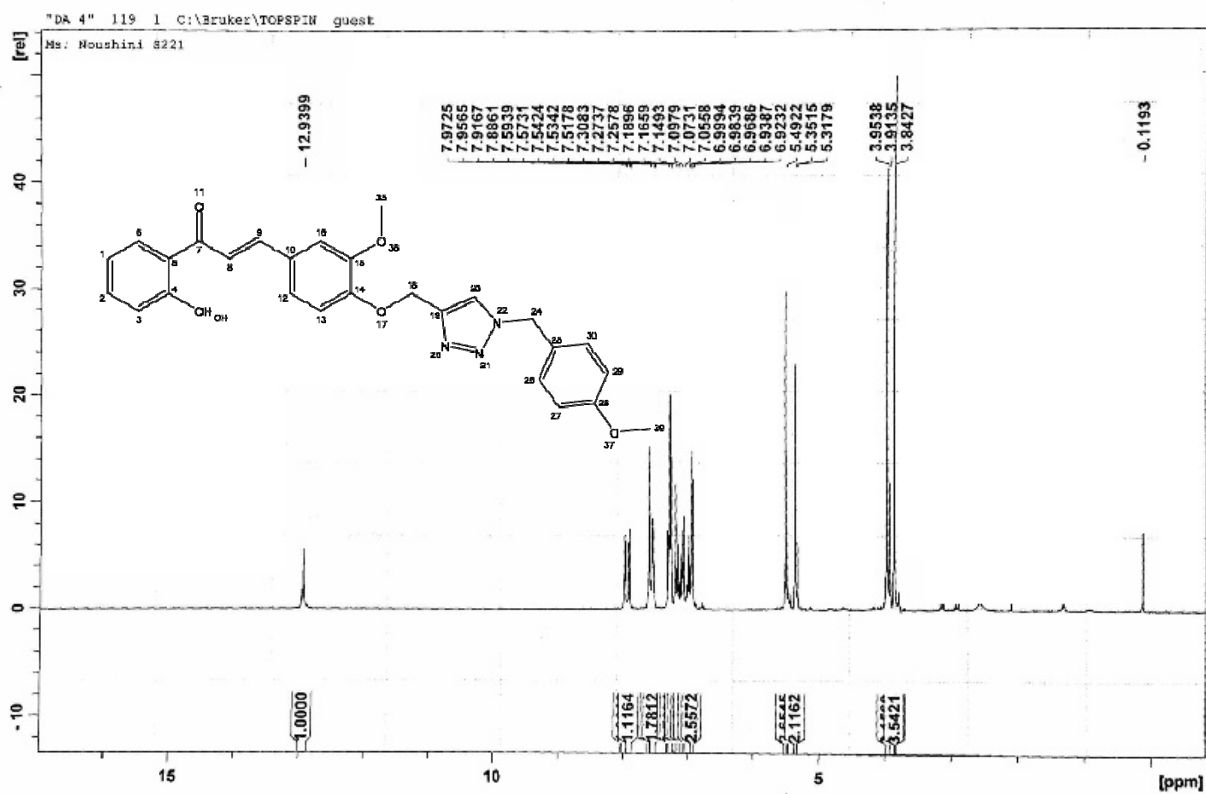

$^1\text{H}$  NMR and  $^{13}\text{C}$  NMR spectra of compound 4j

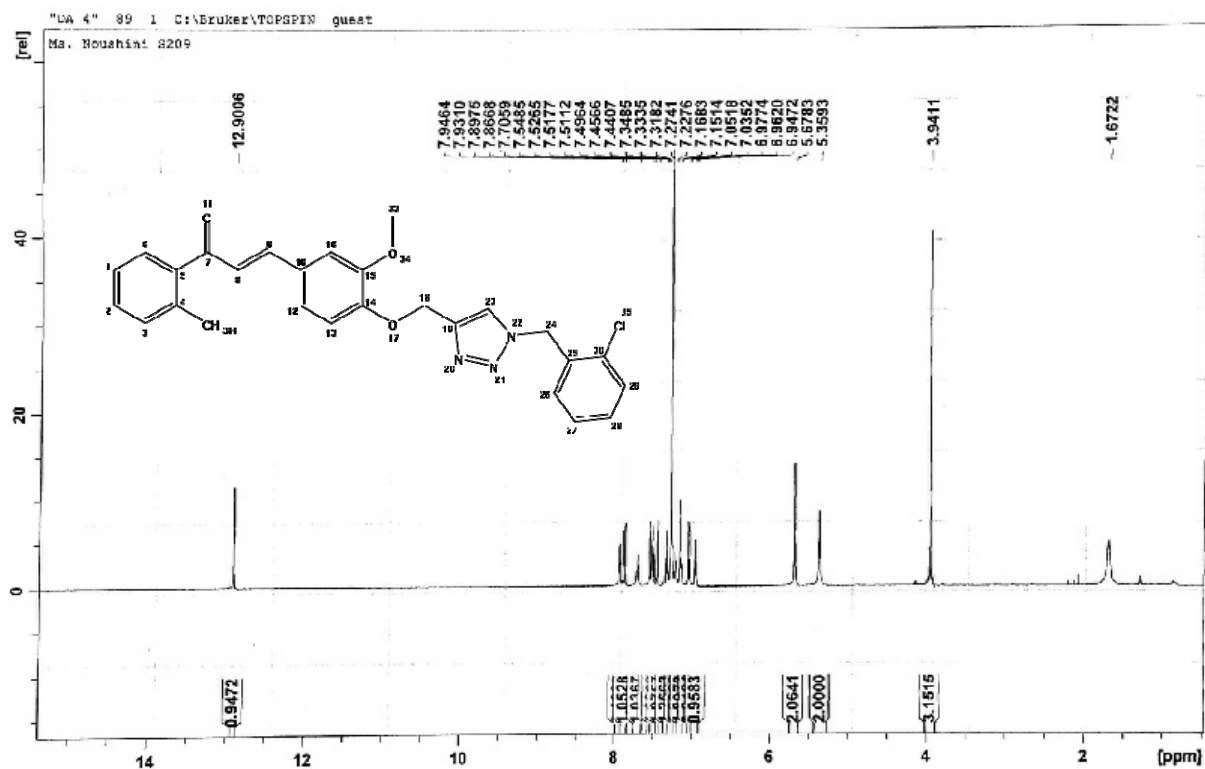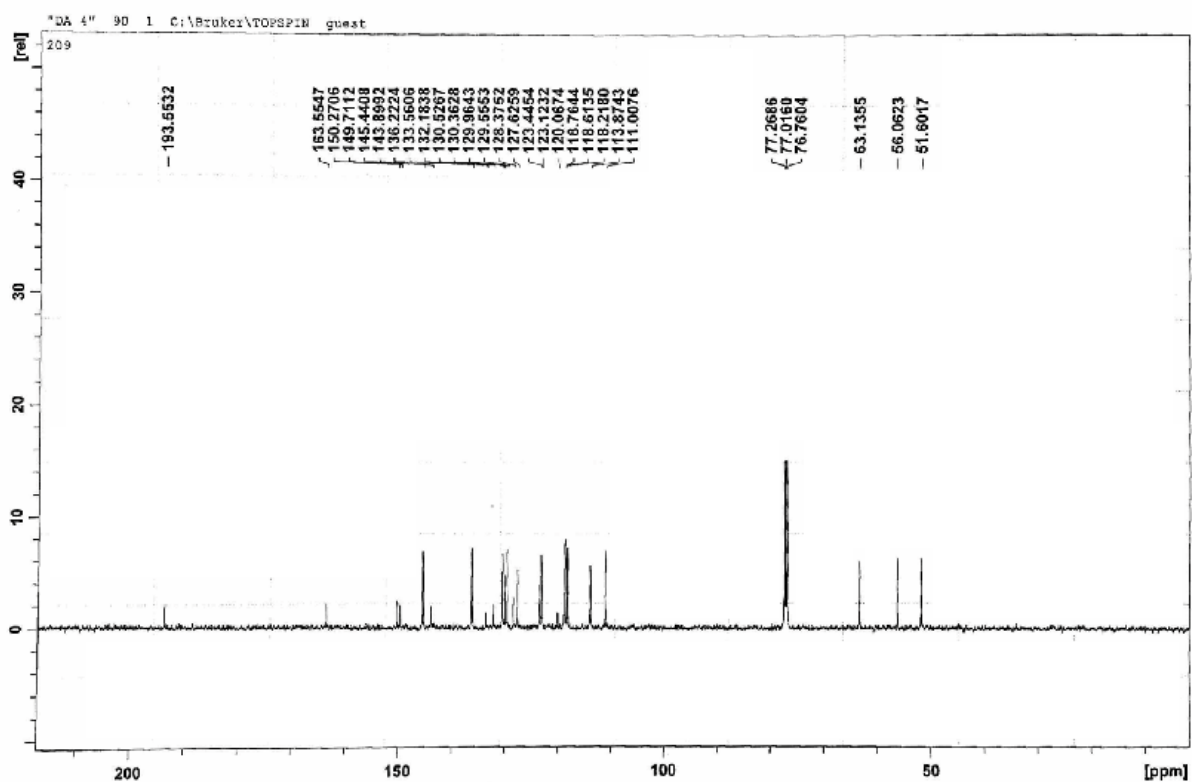

$^1\text{H}$  NMR and  $^{13}\text{C}$  NMR spectra of compound **4k**

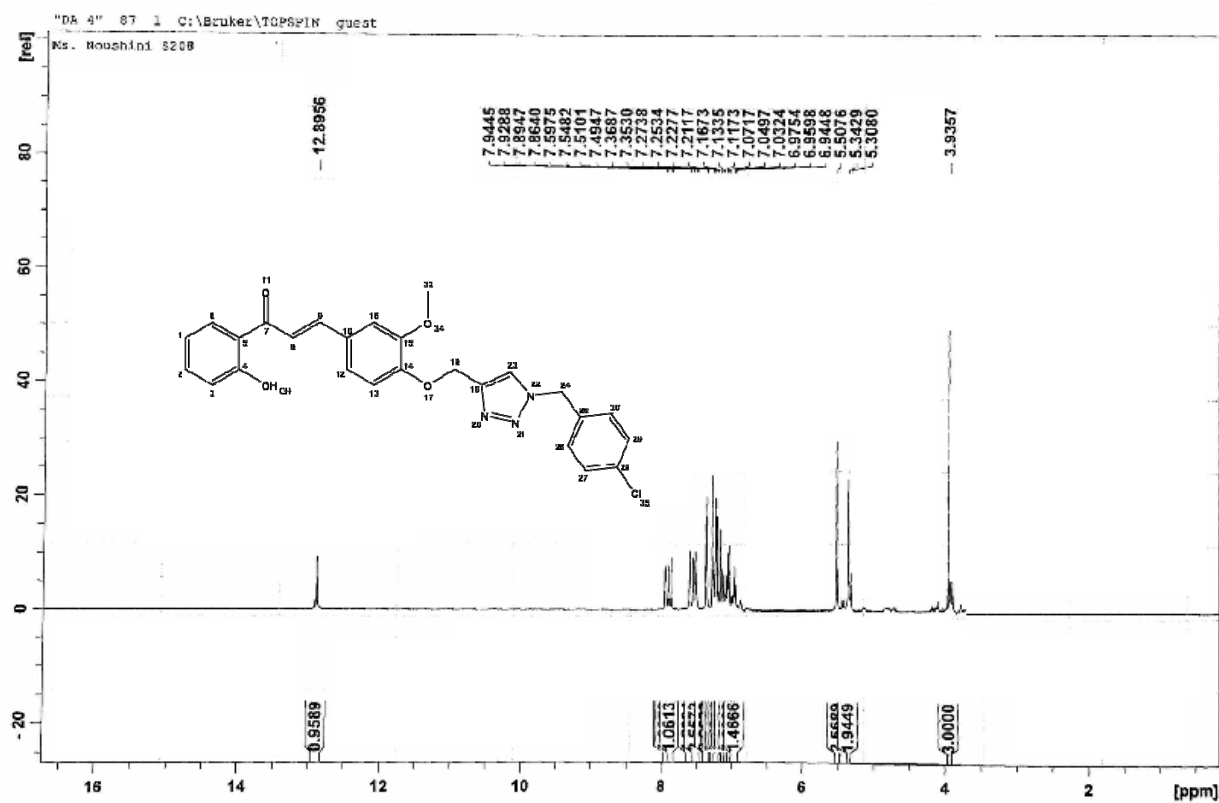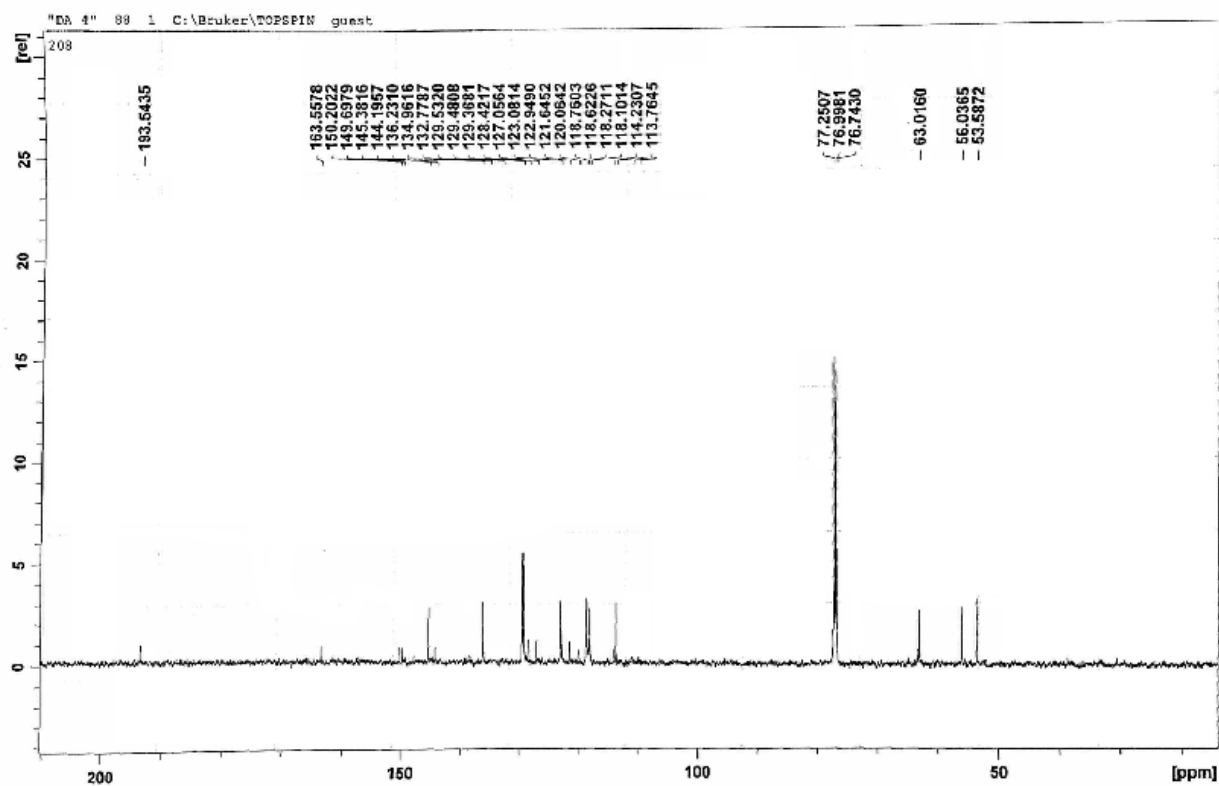

<sup>1</sup>H NMR spectrum of compound **4l**

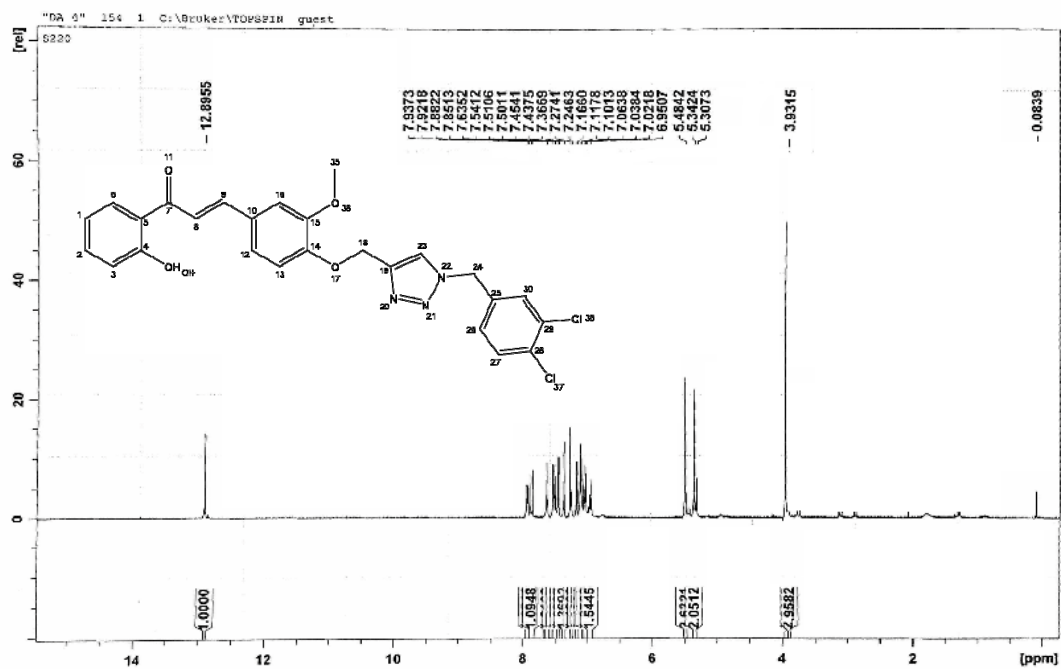

Supplement: Supplementary file 1 [file znb-2017-0115_suppl.pdf]
